# Supplementary material
Source: PubMed Central journal article supplement (PMC10033425)

## Supplemental Material for

Practice patterns and outcomes associated with anticoagulation use following sepsis hospitalization with new-onset atrial fibrillation

Allan J. Walkey MD MSc;<sup>1</sup> Laura C. Myers MD MPH<sup>2,3</sup>; Khanh K. Thai MS;<sup>3</sup> Patricia Kipnis PhD;<sup>3</sup> Manisha Desai PhD;<sup>4</sup> Alan S. Go MD;<sup>2,3,5-7</sup> Yun W. Lu MPH;<sup>3</sup> Heather Clancy MPH;<sup>3</sup> Ycar Devis MPH;<sup>1</sup> Romain Neugebauer PhD,<sup>2,3</sup> Vincent X. Liu MD MS<sup>2,3</sup>

1 Boston University School of Medicine, Boston, MA

2 The Permanente Medical Group, Oakland, CA

3 Division of Research, Kaiser Permanente Northern California, Oakland, CA

4 Biomedical Informatics Department, Stanford University, Palo Alto, CA

5 Department of Health Systems Science, Kaiser Permanente Bernard J. Tyson School of Medicine, Pasadena, CA

6 Departments of Medicine, Epidemiology and Biostatistics, University of California, San Francisco, San Francisco, CA

7 Departments of Medicine, Health Research and Policy, Stanford University School of Medicine, Palo Alto, CA

| <b>Table S1.</b>                   |                                                                                                                                                                                                                                                                                                           |                                                                                                                                                                                                                                                                                                                                                                                                                                                                                                                                                                                                                                                                                                                                                                                                                                                                                                                                                                                                                                                                                                                                 |
|------------------------------------|-----------------------------------------------------------------------------------------------------------------------------------------------------------------------------------------------------------------------------------------------------------------------------------------------------------|---------------------------------------------------------------------------------------------------------------------------------------------------------------------------------------------------------------------------------------------------------------------------------------------------------------------------------------------------------------------------------------------------------------------------------------------------------------------------------------------------------------------------------------------------------------------------------------------------------------------------------------------------------------------------------------------------------------------------------------------------------------------------------------------------------------------------------------------------------------------------------------------------------------------------------------------------------------------------------------------------------------------------------------------------------------------------------------------------------------------------------|
|                                    | <b>ICD-9</b>                                                                                                                                                                                                                                                                                              | <b>ICD-10</b>                                                                                                                                                                                                                                                                                                                                                                                                                                                                                                                                                                                                                                                                                                                                                                                                                                                                                                                                                                                                                                                                                                                   |
| <b>Major bleeding</b>              | 423, 430, 431, 432, 432.1, 432.9, 455.2, 455.5, 455.8, 456, 456.2, 459, 530.7, 530.82, 531.0-531.6, 532.0-532.6, 533.0-533.6, 534.0-534.6, 535.01-535.61, 537.83, 562.02, 562.03, 562.12, 562.13, 568.81, 569.3, 569.85, 578, 578.1, 578.9, 599.7, 719.11, 784.7, 784.8, 786, 852.0x, 852.2x, 852.4x, 853 | I312, I609, I619, I62.X, I621, I629, I8501, I8511, K226, K228, K250-K256, K260-K266, K270-K276, K280-K286, K2901, K2921, K2941-K2951, K2961, K2971, K2991, K31811, K5521, K5711, K5713, K5731, K5733, K625, K644, K648, K648, K661, K920, K921, K922, M25019, R040-R041, R042, R0481, R0489, R049, R310-R312, R319, R58, S06.310A - S06.389S, S064x, S065x, S066x                                                                                                                                                                                                                                                                                                                                                                                                                                                                                                                                                                                                                                                                                                                                                               |
| <b>Transient Ischemic Attack</b>   | 435, 435.1, 435.2, 435.3, 435.8, 435.9                                                                                                                                                                                                                                                                    | G45, G45.0, G45.1, G45.2, G45.8, G45.9, G46.0, G46.1, G46.2, I67.84, I67.841, I67.848, M47.0, M47.02, M47.021, M47.022                                                                                                                                                                                                                                                                                                                                                                                                                                                                                                                                                                                                                                                                                                                                                                                                                                                                                                                                                                                                          |
| <b>Ischemic Stroke</b>             | 433.01, 433.11, 433.21, 433.31, 433.81, 433.91, 434.01, 434.11, 434.91, 436, 436                                                                                                                                                                                                                          | G43.6, G43.601, G43.609, G43.611, G43.619, G46.3, G46.4, G95.11, I63, I63.0, I63.00, I63.01, I63.011, I63.012, I63.013, I63.019, I63.02, I63.03, I63.031, I63.032, I63.033, I63.039, I63.09, I63.1, I63.10, I63.11, I63.111, I63.112, I63.113, I63.119, I63.12, I63.13, I63.131, I63.132, I63.133, I63.139, I63.19, I63.2, I63.20, I63.21, I63.211, I63.212, I63.213, I63.219, I63.22, I63.23, I63.231, I63.232, I63.233, I63.239, I63.29, I63.3, I63.30, I63.31, I63.311, I63.312, I63.313, I63.319, I63.32, I63.321, I63.322, I63.323, I63.329, I63.33, I63.331, I63.332, I63.333, I63.339, I63.34, I63.341, I63.342, I63.343, I63.349, I63.39, I63.4, I63.40, I63.41, I63.411, I63.412, I63.413, I63.419, I63.42, I63.421, I63.422, I63.423, I63.429, I63.43, I63.431, I63.432, I63.433, I63.439, I63.44, I63.441, I63.442, I63.443, I63.449, I63.49, I63.5, I63.50, I63.51, I63.511, I63.512, I63.513, I63.519, I63.52, I63.521, I63.522, I63.523, I63.529, I63.53, I63.531, I63.532, I63.533, I63.539, I63.54, I63.541, I63.542, I63.543, I63.549, I63.59, I63.6, I63.8, I63.9, I97.810, I97.811, I97.82, I97.820, I97.821 |
| <b>Any bleeding as a covariate</b> | 285.1, 423, 430, 431, 432, 432.1, 432.9, 455.2, 455.5, 455.8, 456, 456.2, 459, 530.7, 530.82, 531.0x, 531.2x, 531.4x, 531.6x, 532.0x, 532.2x, 532.4x, 532.6x, 533.0x, 533.2x, 533.4x, 533.6x,                                                                                                             | D62, I312, I312, I60, I609, I61, I610, I611, I614, I615, I618, I619, I62, I6200, I6201, I6202, I6203, I629, I85.01, J94.2, K2211, K2211, K226, K25.0, K25.2, K25.4, K25.6, K254, K26.0, K26.2, K26.4, K26.6, K264, K27.0, K27.2, K27.4, K27.6, K274, K28.0, K28.2,                                                                                                                                                                                                                                                                                                                                                                                                                                                                                                                                                                                                                                                                                                                                                                                                                                                              |

|  |                                                                                                                                                                                                                                                                                                                                   |                                                                                                                                                                                                                                                                                                                                                                                                                                                                           |
|--|-----------------------------------------------------------------------------------------------------------------------------------------------------------------------------------------------------------------------------------------------------------------------------------------------------------------------------------|---------------------------------------------------------------------------------------------------------------------------------------------------------------------------------------------------------------------------------------------------------------------------------------------------------------------------------------------------------------------------------------------------------------------------------------------------------------------------|
|  | 534.0x, 534.2x, 534.4x, 534.6x,<br>535.01, 535.11, 535.21, 535.31,<br>535.41, 535.51, 535.61, 537.83,<br>562.02, 562.03, 562.12, 562.13,<br>568.81, 568.81, 569.3, 569.85,<br>578, 578.1, 578.9, 593.81, 599.7,<br>623.8, 626.2, 626.6, 719.1x,<br>784.7, 784.8, 786.3, 790.01,<br>852.0x, 852.2x, 852.4x, 853,<br>997.02, 998.1x | K28.4, K28.6, K29.0, K2901, K2971, K2971,<br>K2981, K2981, K31811, K31811, K3182,<br>K3182, K5521, K5521, K5731, K5731, K62.5,<br>K625, K6381, K6381, K66.1, K661, K92.0,<br>K92.1, K92.2, K920, K921, K922, M25.0, N02,<br>N92.0, N92.1, N92.4, N93.8, N93.9, N938,<br>N939, N95.0, N950, R04.0, R04.1, R04.2,<br>R04.8, R04.9, R040, R042, R0489, R233, R31,<br>R310, R319, R58, R58, S06.310A -S06.389S,<br>S064x, S065x, S065X0A, S065X9A, S066x,<br>S066X0A, S066X9A |
|--|-----------------------------------------------------------------------------------------------------------------------------------------------------------------------------------------------------------------------------------------------------------------------------------------------------------------------------------|---------------------------------------------------------------------------------------------------------------------------------------------------------------------------------------------------------------------------------------------------------------------------------------------------------------------------------------------------------------------------------------------------------------------------------------------------------------------------|

**Table S2.** Prescriptions of oral anticoagulants (OAC) within 30 days after new-onset atrial fibrillation during sepsis, per year

| Year | Number with OAC prescription within 30 days of sepsis | Number with sepsis | % with OAC prescription within 30 days of sepsis |
|------|-------------------------------------------------------|--------------------|--------------------------------------------------|
| 2011 | 97                                                    | 541                | 18%                                              |
| 2012 | 98                                                    | 622                | 16%                                              |
| 2013 | 119                                                   | 631                | 19%                                              |
| 2014 | 120                                                   | 619                | 19%                                              |
| 2015 | 110                                                   | 555                | 20%                                              |
| 2016 | 158                                                   | 580                | 27%                                              |
| 2017 | 105                                                   | 444                | 24%                                              |

**Table S3. Multivariable adjusted logistic regression model exploring factors associated with receipt of anticoagulants within 30 days of sepsis hospitalization discharge.**

| Characteristics                                       | Odds ratio | p-value |
|-------------------------------------------------------|------------|---------|
| <b>Pre-sepsis hospitalization</b>                     |            |         |
| Age, per year                                         | 0.966      | <0.001  |
| Race and Ethnicity                                    |            |         |
| Asian                                                 | reference  |         |
| Black                                                 | 1.072      | 0.806   |
| Hispanic                                              | 0.805      | 0.383   |
| Other                                                 | 0.645      | 0.425   |
| White                                                 | 1.068      | 0.717   |
| Sex, male                                             | 0.955      | 0.764   |
| Body mass index                                       | 0.992      | 0.334   |
| Smoking history                                       | 1.030      | 0.801   |
| Atherosclerotic cardiovascular disease score          | 1.142      | 0.729   |
| <b>Medications prior to sepsis hospitalization</b>    |            |         |
| Anti-platelet                                         | 0.465      | 0.017   |
| Statin                                                | 1.383      | 0.027   |
| Anti-hypertensive                                     | 1.317      | 0.117   |
| Charlson comorbidity Index                            | 0.708      | 0.004   |
| Chronic pulmonary disease                             | 1.527      | 0.015   |
| Hemiplegia or paraplegia                              | 1.024      | 0.970   |
| Acquired Immunodeficiency Syndrome                    | 23.616     | 0.017   |
| Chronic kidney disease                                | 1.526      | 0.004   |
| Dementia                                              | 0.831      | 0.716   |
| Diabetes                                              | 2.030      | 0.001   |
| Diabetes with chronic complications                   | 1.236      | 0.374   |
| Malignancy, including leukemia and lymphoma           | 1.821      | 0.039   |
| Mild liver disease                                    | 1.375      | 0.515   |
| Metastatic solid tumor                                | 2.627      | 0.126   |
| Peptic ulcer disease                                  | 1.430      | 0.280   |
| Peripheral vascular disorder                          | 1.836      | 0.001   |
| Renal Disease                                         | 1.968      | 0.018   |
| Rheumatologic disease                                 | 1.200      | 0.541   |
| Moderate or severe liver disease                      | 3.795      | 0.070   |
| Myocardial Infarction                                 | 1.069      | 0.754   |
| CHADS2-VASc Score for Atrial Fibrillation Stroke Risk | 1.104      | 0.275   |
| <b>During sepsis hospitalization</b>                  |            |         |

|                                                                                                |       |        |
|------------------------------------------------------------------------------------------------|-------|--------|
| Percentage of cardiac flowsheet with atrial fibrillation                                       | 1.006 | 0.001  |
| Atrial fibrillation diagnosis code (all patients had atrial fibrillation on cardiac flowsheet) | 3.315 | <0.001 |
| Atrial fibrillation on cardiac flowsheet on day of discharge                                   | 2.137 | <0.001 |
| Maximum Sequential Organ Failure Assessment score                                              | 1.006 | 0.873  |
| Laboratory acute physiology score, version 2                                                   | 0.994 | <0.001 |
| Medications                                                                                    |       |        |
| Anticoagulants                                                                                 | 19.4  | <0.001 |
| Aspirin                                                                                        | 0.949 | 0.692  |
| Other Antiplatelet                                                                             | 0.557 | 0.030  |
| Statin                                                                                         | 1.071 | 0.631  |
| Inotrope (Dobutamine or Milrinone)                                                             | 1.224 | 0.502  |
| Vasopressor                                                                                    | 1.102 | 0.644  |
| Other inpatient procedures                                                                     |       |        |
| First EF measure (%), median [Interquartile Range] (IQR)                                       | 0.986 | 0.040  |
| Intensive care unit admission                                                                  | 1.061 | 0.681  |
| Days of invasive mechanical ventilation, median [IQR]                                          | 0.934 | 0.293  |
| Days of non-invasive mechanical ventilation, median [IQR]                                      | 0.978 | 0.622  |
| Hemodialysis                                                                                   | 0.629 | 0.278  |
| Head computerized tomography scan                                                              | 0.669 | 0.057  |
| Coronary artery bypass graft procedure                                                         | 1.387 | 0.608  |
| Percutaneous intervention procedure                                                            | 0.836 | 0.707  |
| Red blood cell transfusion                                                                     | 0.712 | 0.168  |
| Cryoprecipitate transfusion                                                                    | 0.584 | 0.339  |
| Platelet transfusion                                                                           | 1.397 | 0.559  |
| Total blood product volume                                                                     | 1.000 | 0.951  |
| Other diagnoses during hospitalization                                                         |       |        |
| Peripheral arterial disease                                                                    | 1.734 | 0.433  |
| Bleeding                                                                                       | 0.619 | 0.014  |

|                                                                    |       |        |
|--------------------------------------------------------------------|-------|--------|
| Fall                                                               | 0.410 | <0.001 |
| Malignancy                                                         | 0.653 | 0.143  |
| Dementia                                                           | 0.287 | 0.001  |
| Heart failure                                                      | 1.458 | 0.006  |
| Myocardial infarction                                              | 0.495 | 0.002  |
| Hospital baseline vital signs and laboratory values (median [IQR]) |       |        |
| Systolic blood pressure mmHg                                       | 1.005 | 0.156  |
| Heart rate, beats per minute                                       | 1.001 | 0.793  |
| Hemoglobin                                                         | 1.119 | 0.003  |
| Hemoglobin A1c %                                                   | 0.879 | 0.123  |
| Blood urea nitrogen                                                | 0.991 | 0.058  |
| Platelets, x 10 <sup>3</sup>                                       | 1.002 | 0.033  |
| Creatinine                                                         | 1.023 | 0.823  |
| Hospital most extreme selected laboratory values (median [IQR])    |       |        |
| Troponin I                                                         | 1.017 | 0.048  |
| Brain Natriuretic Peptide                                          | 1.000 | 0.733  |
| Creatinine                                                         | 0.989 | 0.853  |
| Lactic Acid                                                        | 0.941 | 0.130  |
| Prothrombin time                                                   | 1.064 | <0.001 |
| Lowest platelet count x 10 <sup>3</sup>                            | 1.000 | 0.685  |
| Hospital length of stay, days                                      | 0.957 | 0.095  |
|                                                                    |       |        |

**Table S4.** Distribution of unstabilized inverse probability weights from SuperLearner for each observation of follow up time among patients prescribed anticoagulants

| <b>Inverse probability weights</b> | <b>Number of observations</b> | <b>Proportion of observations</b> | <b>Cumulative proportion</b> |
|------------------------------------|-------------------------------|-----------------------------------|------------------------------|
| (-infinity, 0)                     | 0                             | 0.0                               | 0.0                          |
| [0,0.5)                            | 0                             | 0.0                               | 0.0                          |
| [0.5,1)                            | 375                           | 0.0015                            | 0.0015                       |
| [1,10)                             | 236909                        | 0.9677                            | 0.9692                       |
| [10,20)                            | 6296                          | 0.0257                            | 0.9949                       |
| [20,30)                            | 749                           | 0.0031                            | 0.9980                       |
| [30,40)                            | 277                           | 0.0011                            | 0.9991                       |
| [40,50)                            | 99                            | 0.0004                            | 0.9995                       |
| [50,60)                            | 31                            | 0.0001                            | 0.9997                       |
| [60,70)                            | 22                            | 0.0001                            | 0.9998                       |
| [70,80)                            | 14                            | 0.0001                            | 0.9998                       |
| [80,90)                            | 11                            | 0.00001                           | 0.9999                       |
| [90,100)                           | 20                            | 0.00008                           | 0.9999                       |
| [100,150)                          | 5                             | 0.00002                           | 0.9999                       |
| [150, Inf)                         | 11                            | 0.00005                           | 1.0                          |



**Table S5.** Distribution of unstabilized inverse probability weights from SuperLearner for each observation of follow up time among patients not prescribed anticoagulants

| <b>Inverse probability weights</b> | <b>Number of observations</b> | <b>Proportion of observations</b> | <b>Cumulative proportion</b> |
|------------------------------------|-------------------------------|-----------------------------------|------------------------------|
| [-Inf,0)                           | 0                             | 0.0                               | 0.0                          |
| [0,0.5)                            | 0                             | 0.0                               | 0.0                          |
| [0.5,1)                            | 3590                          | 0.0043                            | 0.0043                       |
| [1,10)                             | 837712                        | 0.9914                            | 0.9956                       |
| [10,20)                            | 3349                          | 0.0040                            | 0.9996                       |
| [20,30)                            | 262                           | 0.0003                            | 0.9999                       |
| [30,40)                            | 38                            | 0.00005                           | 0.9999                       |
| [40,50)                            | 25                            | 0.00003                           | 0.9999                       |
| [50,60)                            | 8                             | 0.00001                           | 1.0                          |
| [60,70)                            | 0                             | 0.0                               | 1.0                          |
| [70,80)                            | 0                             | 0.0                               | 1.0                          |
| [80,90)                            | 0                             | 0.0                               | 1.0                          |
| [90,100)                           | 0                             | 0.0                               | 1.0                          |
| [100,150)                          | 0                             | 0.0                               | 1.0                          |
| [150, Inf)                         | 0                             | 0.0                               | 1.0                          |

**Table S6.** Combined distribution of stabilized inverse probability weights from Super Learner for each observation of follow up time

| <b>Inverse probability weights</b> | <b>Number of observations</b> | <b>Proportion of observations</b> | <b>Cumulative proportion</b> |
|------------------------------------|-------------------------------|-----------------------------------|------------------------------|
| (-infinity, 0)                     | 0                             | 0                                 | 0                            |
| [0,0.5)                            | 120956                        | 0.110989                          | 0.110989                     |
| [0.5,1)                            | 516666                        | 0.474091                          | 0.58508                      |
| [1,10)                             | 451788                        | 0.414559                          | 0.999639                     |
| [10,20)                            | 348                           | 0.000319                          | 0.999959                     |
| [20,30)                            | 34                            | 3.12E-05                          | 0.99999                      |
| [30,40)                            | 0                             | 0                                 | 0.99999                      |
| [40,50)                            | 0                             | 0                                 | 0.99999                      |
| [50,60)                            | 0                             | 0                                 | 0.99999                      |
| [60,70)                            | 0                             | 0                                 | 0.99999                      |
| [70,80)                            | 0                             | 0                                 | 0.99999                      |
| [80,90)                            | 0                             | 0                                 | 0.99999                      |
| [90,100)                           | 0                             | 0                                 | 0.99999                      |
| [100,150)                          | 0                             | 0                                 | 0.99999                      |
| [150, Inf)                         | 11                            | 1.01E-05                          | 1                            |

**Table S7.** Combined distribution of stabilized inverse probability weights from logistic regression for each observation of follow up time

| <b>Inverse probability weights</b> | <b>Number of observations</b> | <b>Proportion of observations</b> | <b>Cumulative proportion</b> |
|------------------------------------|-------------------------------|-----------------------------------|------------------------------|
| (-infinity, 0)                     | 0                             | 0                                 | 0                            |
| [0,0.5)                            | 41621                         | 0.0412779                         | 0.0412779                    |
| [0.5,1)                            | 517031                        | 0.5127689                         | 0.5540468                    |
| [1,10)                             | 448427                        | 0.4447304                         | 0.9987772                    |
| [10,20)                            | 955                           | 0.0009471                         | 0.9997243                    |
| [20,30)                            | 131                           | 0.0001299                         | 0.9998542                    |
| [30,40)                            | 46                            | 0.0000456                         | 0.9998998                    |
| [40,50)                            | 44                            | 0.0000436                         | 0.9999435                    |
| [50,60)                            | 19                            | 0.0000188                         | 0.9999623                    |
| [60,70)                            | 16                            | 0.0000159                         | 0.9999782                    |
| [70,80)                            | 7                             | 0.0000069                         | 0.9999851                    |
| [80,90)                            | 4                             | 0.000004                          | 0.9999891                    |
| [90,100)                           | 0                             | 0                                 | 0.9999891                    |
| [100,150)                          | 0                             | 0                                 | 0.9999891                    |
| [150, Inf)                         | 11                            | 0.0000109                         | 1                            |

| <b>Table S8.</b> Results of marginal structural models using <i>untruncated</i> inverse probability of treatment weights evaluating causal associations between anticoagulation and risks of stroke/transient ischemic attack (TIA) and bleeding within 1-year after hospitalization with sepsis and new-onset atrial fibrillation. |                                                                            |                                                                              |                                                                    |
|-------------------------------------------------------------------------------------------------------------------------------------------------------------------------------------------------------------------------------------------------------------------------------------------------------------------------------------|----------------------------------------------------------------------------|------------------------------------------------------------------------------|--------------------------------------------------------------------|
| <b>Model</b>                                                                                                                                                                                                                                                                                                                        | <b>Cumulative one-year incidence of outcome in Anticoagulation-exposed</b> | <b>Cumulative one-year incidence of outcome in Anticoagulation-Unexposed</b> | <b>Risk difference (95% Confidence Interval) Exposed-Unexposed</b> |
|                                                                                                                                                                                                                                                                                                                                     | <b>Outcome: Stroke/TIA</b>                                                 |                                                                              |                                                                    |
| <b>Primary adjusted model:</b><br>Anticoagulation within 30-days of discharge, per-protocol, Super Learner propensity score                                                                                                                                                                                                         | 6.2%                                                                       | 2.3%                                                                         | 3.9% (0, 7.7%)                                                     |
| <b>Sensitivity Analyses</b>                                                                                                                                                                                                                                                                                                         |                                                                            |                                                                              |                                                                    |
| Anticoagulation within 30-days of discharge, per-protocol, logistic regression propensity score                                                                                                                                                                                                                                     | 2.8%                                                                       | 2.2%                                                                         | 0.6% (-2.6, 3.8%)                                                  |
| Anticoagulation within 30-days of discharge, intention to treat, Super Learner                                                                                                                                                                                                                                                      | 3.6%                                                                       | 2.3%                                                                         | 1.3% (-0.2, 2.9%)                                                  |
| Anticoagulation within 24 hours of hospital discharge, per protocol, Super Learner                                                                                                                                                                                                                                                  | 8.4%                                                                       | 2.3%                                                                         | 6% (-0.2, 12%)                                                     |
| Anticoagulation within 24 hours of hospital discharge, intention to treat, Super Learner                                                                                                                                                                                                                                            | 4.9%                                                                       | 2.4%                                                                         | 2.5% (-0.1, 5%)                                                    |
|                                                                                                                                                                                                                                                                                                                                     | <b>Outcome: Major Bleeding</b>                                             |                                                                              |                                                                    |
| <b>Primary adjusted model:</b><br>Anticoagulation within 30-days of discharge, per-protocol, Super Learner propensity score                                                                                                                                                                                                         | 6.4%                                                                       | 7.3%                                                                         | -0.9% (-1.7, 3.4%)                                                 |
| <b>Sensitivity Analyses</b>                                                                                                                                                                                                                                                                                                         |                                                                            |                                                                              |                                                                    |
| Anticoagulation within 30-days of discharge, per-protocol, logistic regression propensity score                                                                                                                                                                                                                                     | 6.1%                                                                       | 10%                                                                          | -4.0% (-8.7, 0.94%)                                                |
| Anticoagulation within 30-days of discharge, intention to treat, Super Learner                                                                                                                                                                                                                                                      | 7.7%                                                                       | 7.3%                                                                         | 0.4% (-2.7%, 1.9%)                                                 |

|                                                                                          |      |      |                   |
|------------------------------------------------------------------------------------------|------|------|-------------------|
| Anticoagulation within 24 hours of hospital discharge, per protocol, Super Learner       | 7.5% | 7.4% | 0.3% (-2.1, 2.7%) |
| Anticoagulation within 24 hours of hospital discharge, intention to treat, Super Learner | 7.6% | 7.1% | 0.5% (-3.8, 2.8%) |

**Figure S1.** Cumulative incidence of stroke and transient ischemic attack following hospitalization with sepsis and new-onset atrial fibrillation.

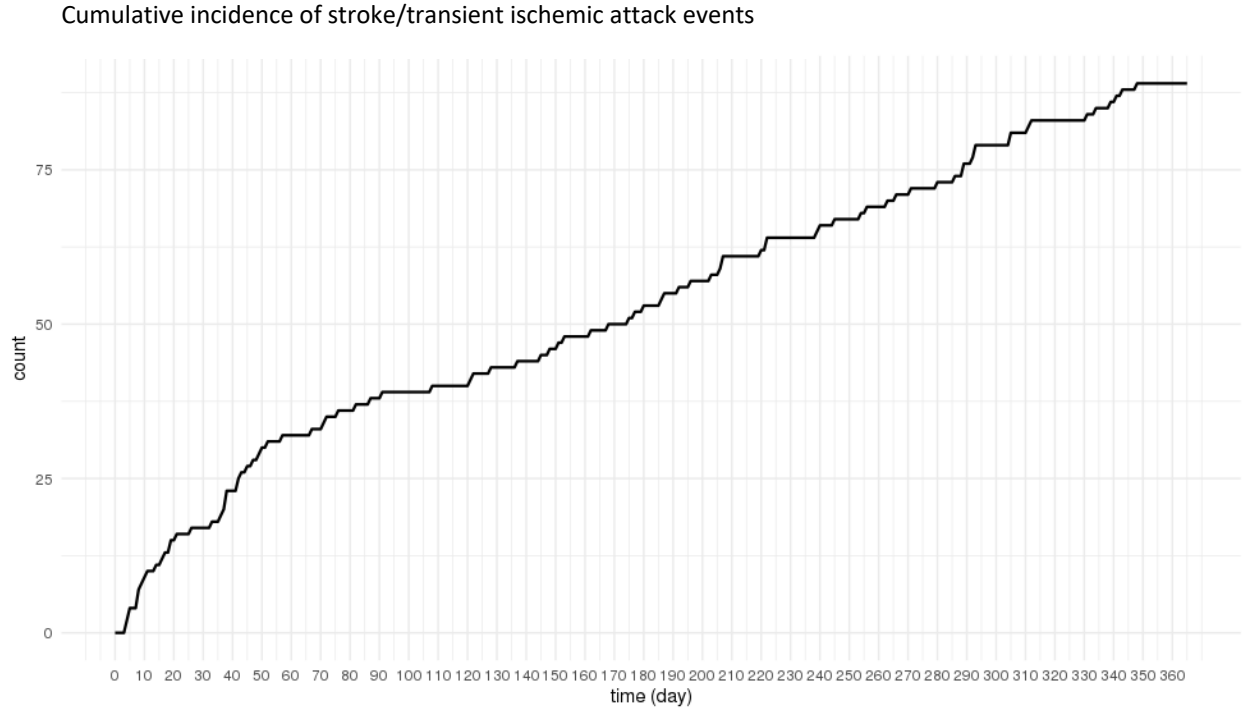

**Figure S2.** Counts of patients following the treatment protocols of the control and exposed arms during follow-up in the primary analyses (per-protocol, exposure arm defined by a stochastic treatment regimen providing a 30-day grace period to initiate anticoagulant therapy, control arm defined by a static treatment regimen).

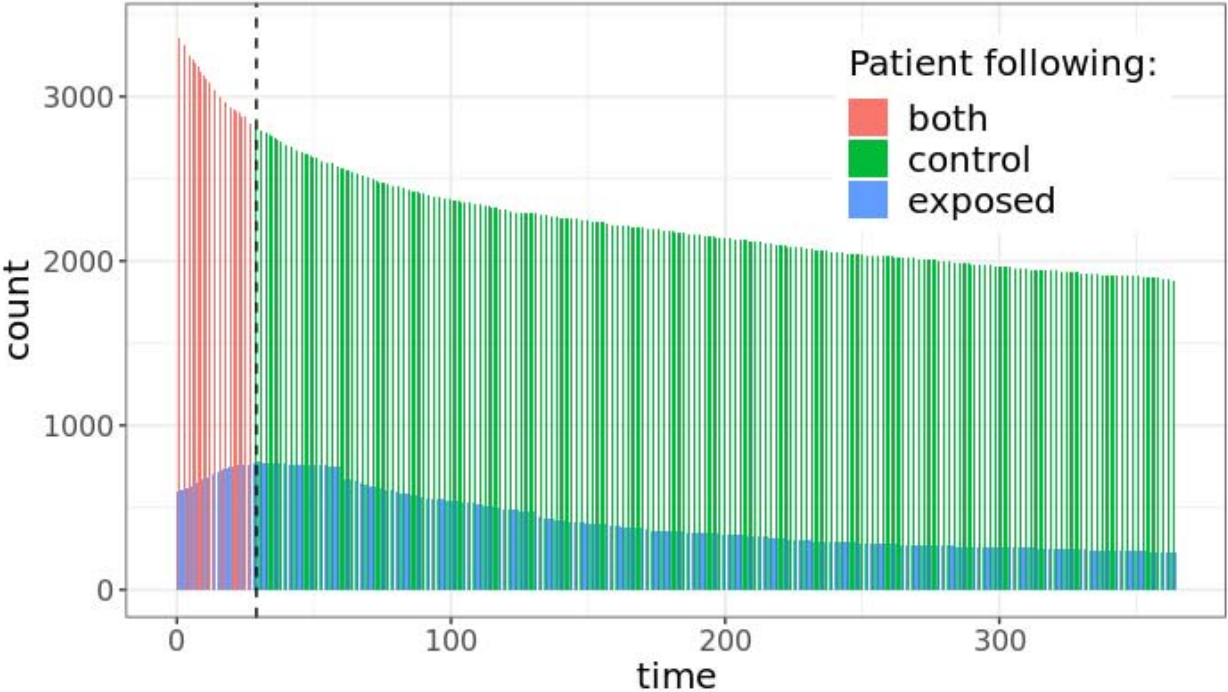

**Figure S3.** Sensitivity analysis, stroke/transient ischemic attack outcome: Per-protocol analysis, exposure arm defined by a stochastic treatment regimen providing a 30-day grace period to initiate anticoagulant therapy, control arm defined by a static treatment regimen, inverse probability of treatment weights calculated from logistic regression model. Blue line: anticoagulant group; red line: No anticoagulant group.

Outcome: Stroke/Transient Ischemic Attack – Per-protocol – Stochastic Intervention (Non-machine Learning)  
Inverse Probability of Treatment Weighting 99<sup>th</sup> Percentile Truncated

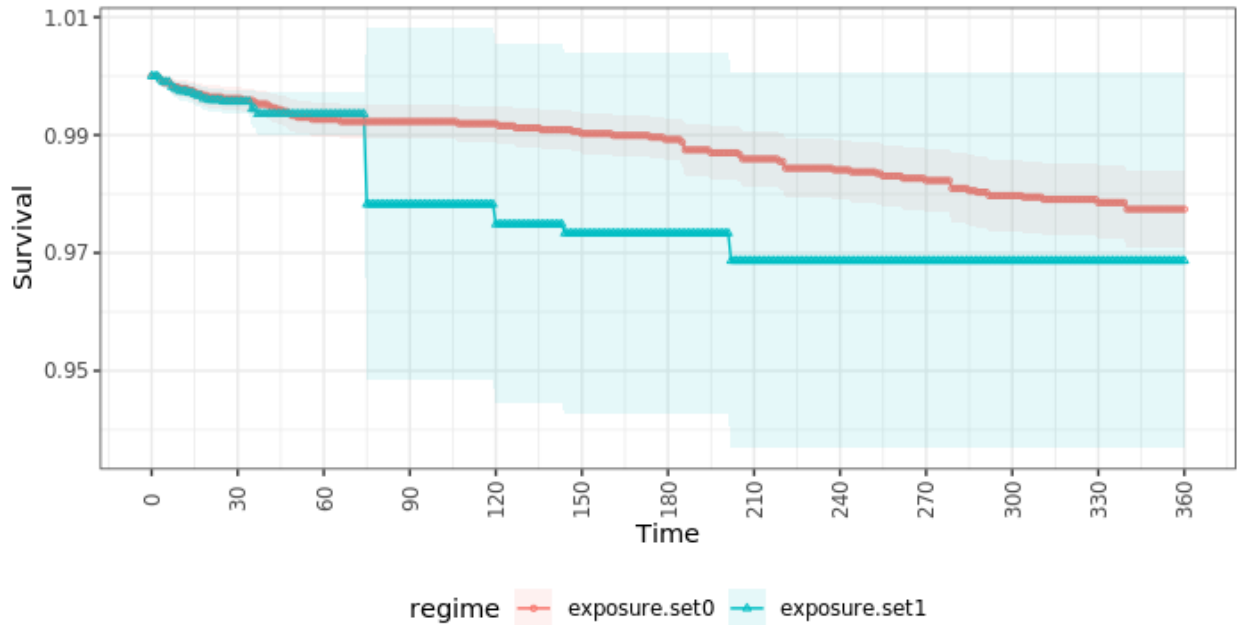



**Figure S4.** Patient counts across the study timeline and outcomes in the sensitivity analysis using an intention-to-treat approach and a 30-day grace period to initiate anticoagulant therapy. Blue line: anticoagulant group; red line: No anticoagulant group.

**Figure S4A.** Counts of patients following the treatment protocols of the control and exposed arms during follow-up in secondary, intention-to-treat analysis (exposure arm defined by a stochastic treatment regimen providing a 30-day grace period to initiate anticoagulant therapy, control arm defined by a static treatment regimen).

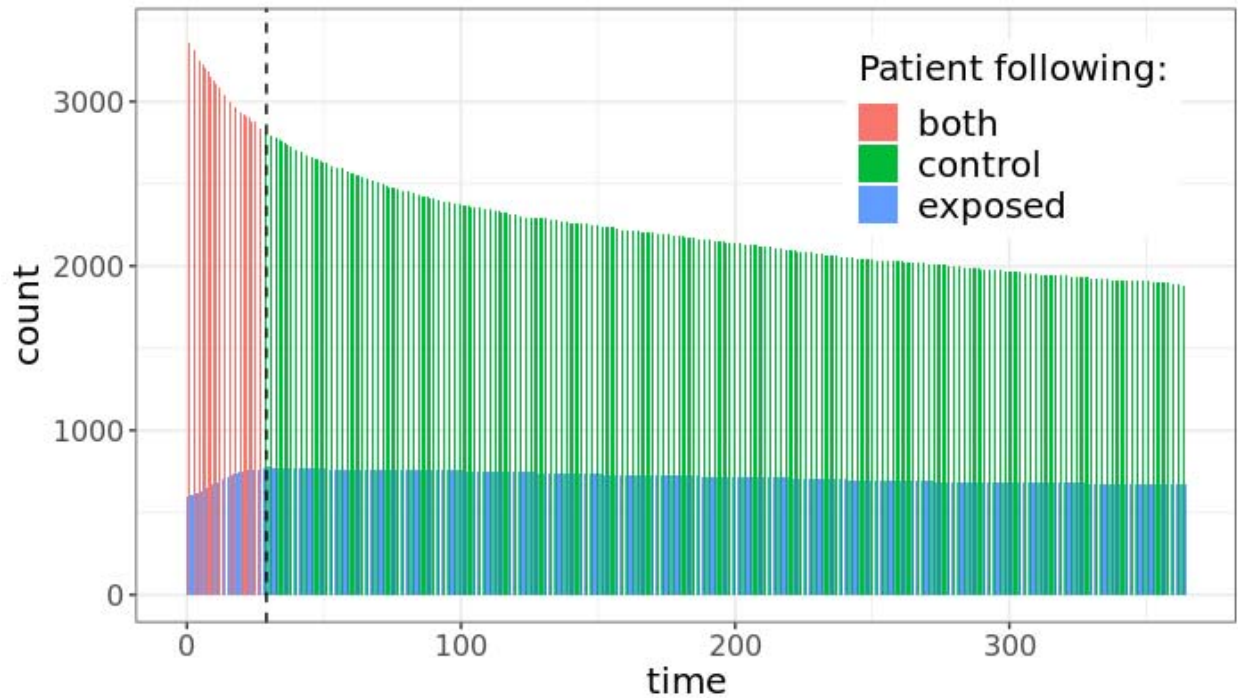

**Figure S4B.** Sensitivity analysis, stroke/transient ischemic attack: Intention-to-treat approach, exposure arm defined by a stochastic treatment regimen providing a 30-day grace period to initiate anticoagulant therapy, control arm defined by a static treatment regimen, inverse probability of treatment weights calculated from Super Learner suite.

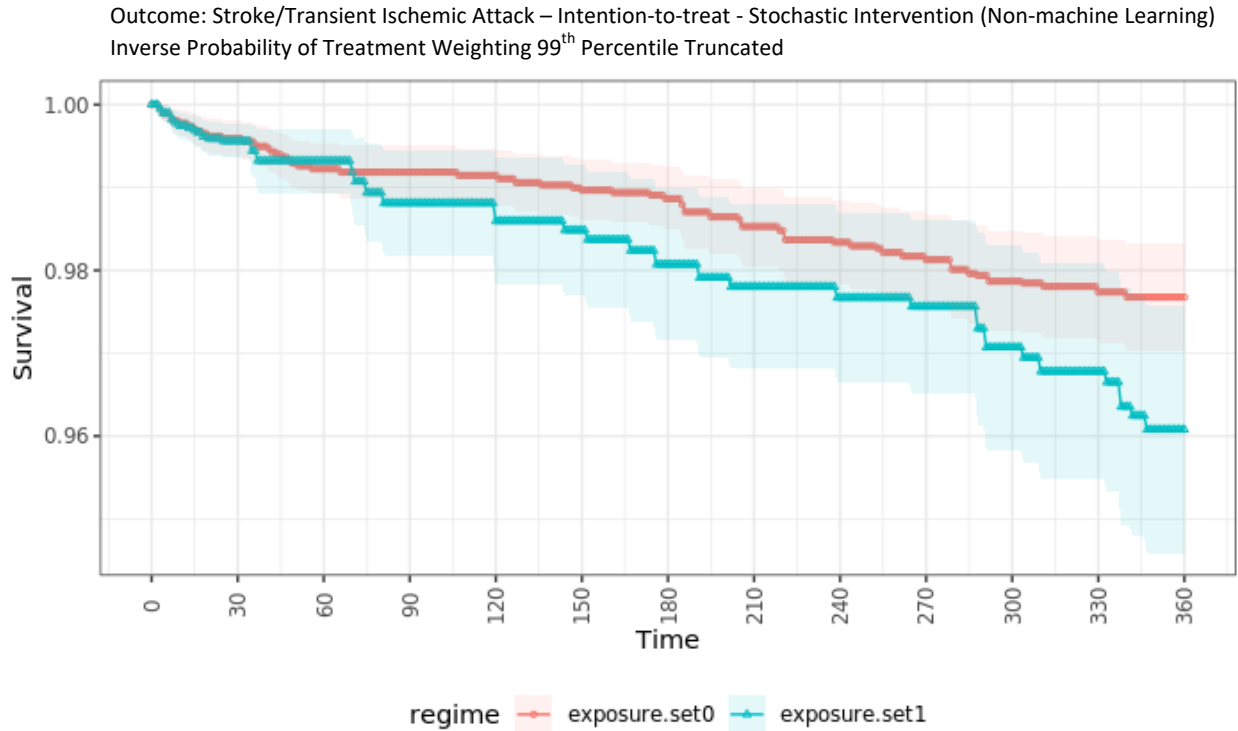

**Figure S5.** Patient counts across the study timeline and outcomes in the sensitivity analysis using a per-protocol approach and initiation of anticoagulant therapy within 24 hours of hospital discharge. Blue line: anticoagulant group; red line: No anticoagulant group.

**Figure S5A.** Counts of patients following the treatment protocols of the control and exposed arms during follow-up in the secondary per protocol analysis with anticoagulation exposure arm defined within 24 hours of hospital discharge.

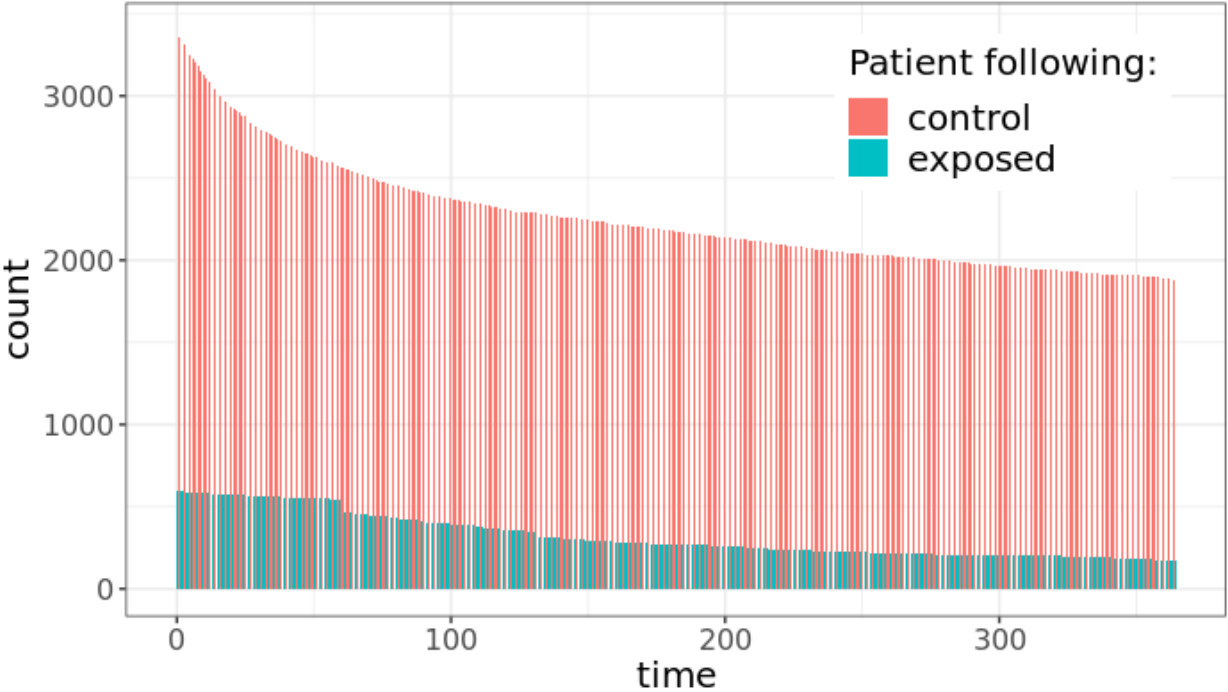

**Figure S5B.** Sensitivity analysis, stroke/transient ischemic attack: Per-protocol approach, exposure arm defined by anticoagulant therapy dispensed at hospital discharge, control arm defined by a static treatment regimen, inverse probability of treatment weights calculated from Super Learner suite.

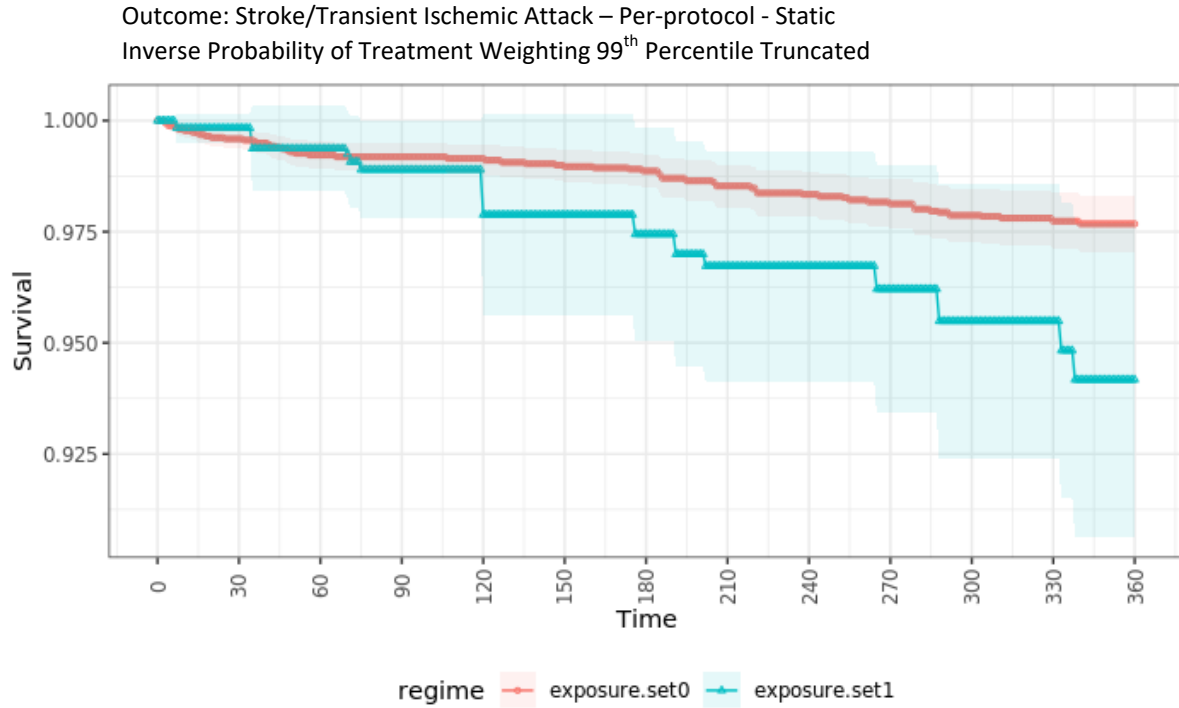

**Figure S6.** Patient counts across the study timeline and outcomes in the sensitivity analysis using an intention-to-treat approach and initiation of anticoagulant therapy within 24 hours of hospital discharge. Blue line: anticoagulant group; red line: No anticoagulant group.

**Figure S6A.** Counts of patients following the treatment protocols of the control and exposed arms during follow-up in the secondary intention-to-treat analysis with anticoagulation exposure arm defined within 24 hours of hospital discharge.

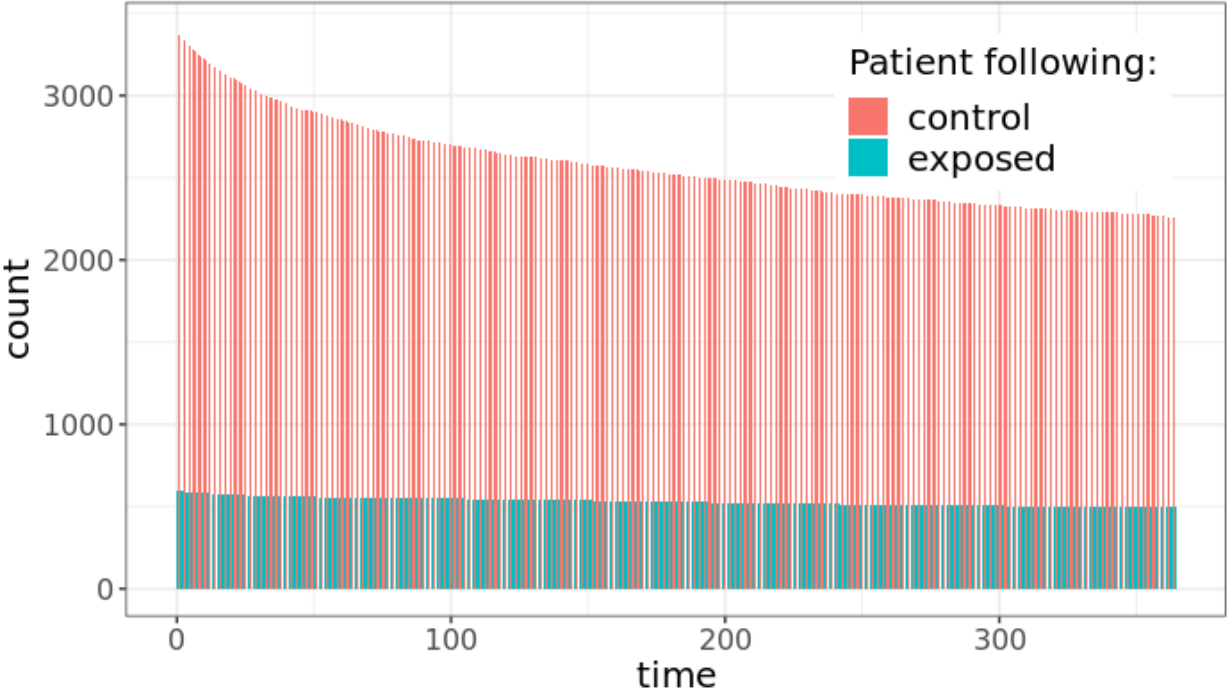

**Figure S6B.** Sensitivity analysis, stroke/transient ischemic attack: Intention-to-treat approach, exposure arm defined by anticoagulant therapy dispensed at hospital discharge, control arm defined by a static treatment regimen, inverse probability of treatment weights calculated from Super Learner suite.

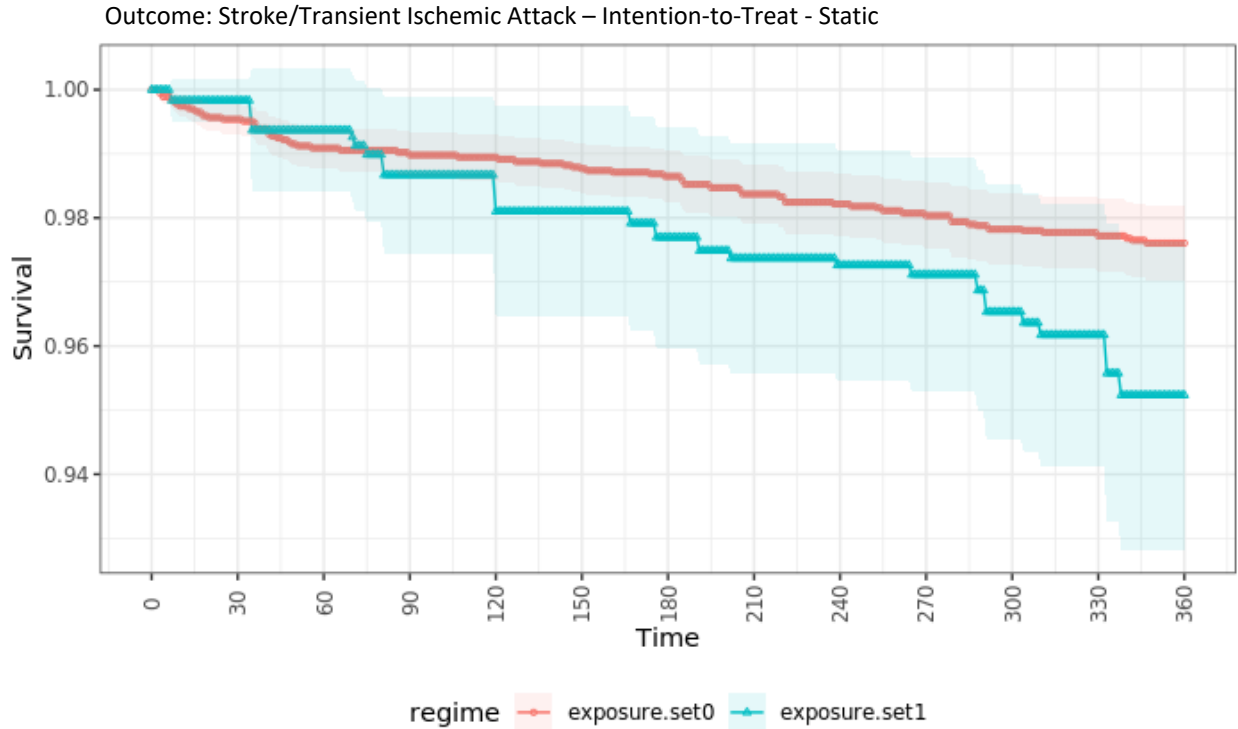

**Figure S7.** Survival curves for sensitivity analysis models evaluating association between anticoagulation and bleeding outcomes across different specifications of inverse probability of treatment weight models, timing of anticoagulant initiation, and analysis frameworks (per protocol vs. intention-to-treat). Blue line: anticoagulant group; red line: No anticoagulant group.

Figure S7A. Sensitivity analysis, major bleeding outcome. Per-protocol analysis, exposure arm defined by a stochastic treatment regimen providing a 30-day grace period to initiate anticoagulant therapy, control arm defined by a static treatment regimen, inverse probability of treatment weights calculated from logistic regression model.

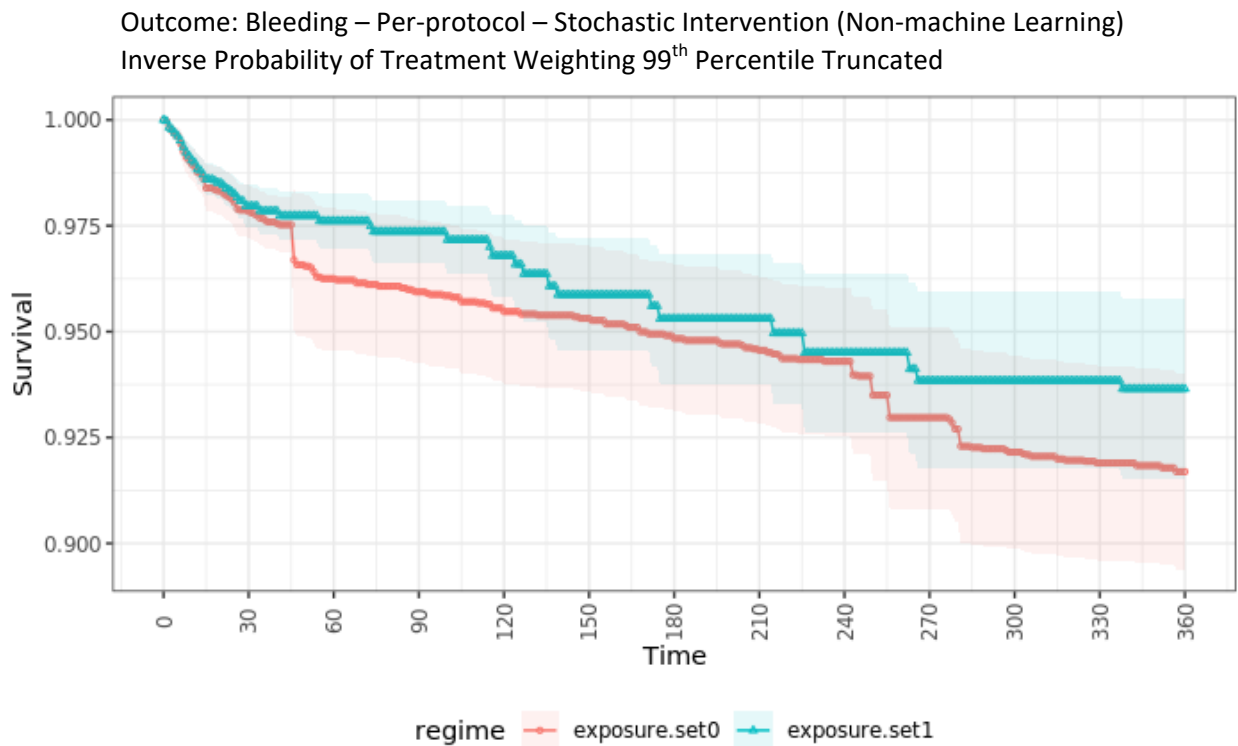

Figure S7B. Sensitivity analysis, major bleeding outcome. Intention-to-treat approach, exposure arm defined by a stochastic treatment regimen providing a 30-day grace period to initiate anticoagulant therapy, control arm defined by a static treatment regimen, inverse probability of treatment weights calculated from Super Learner suite.

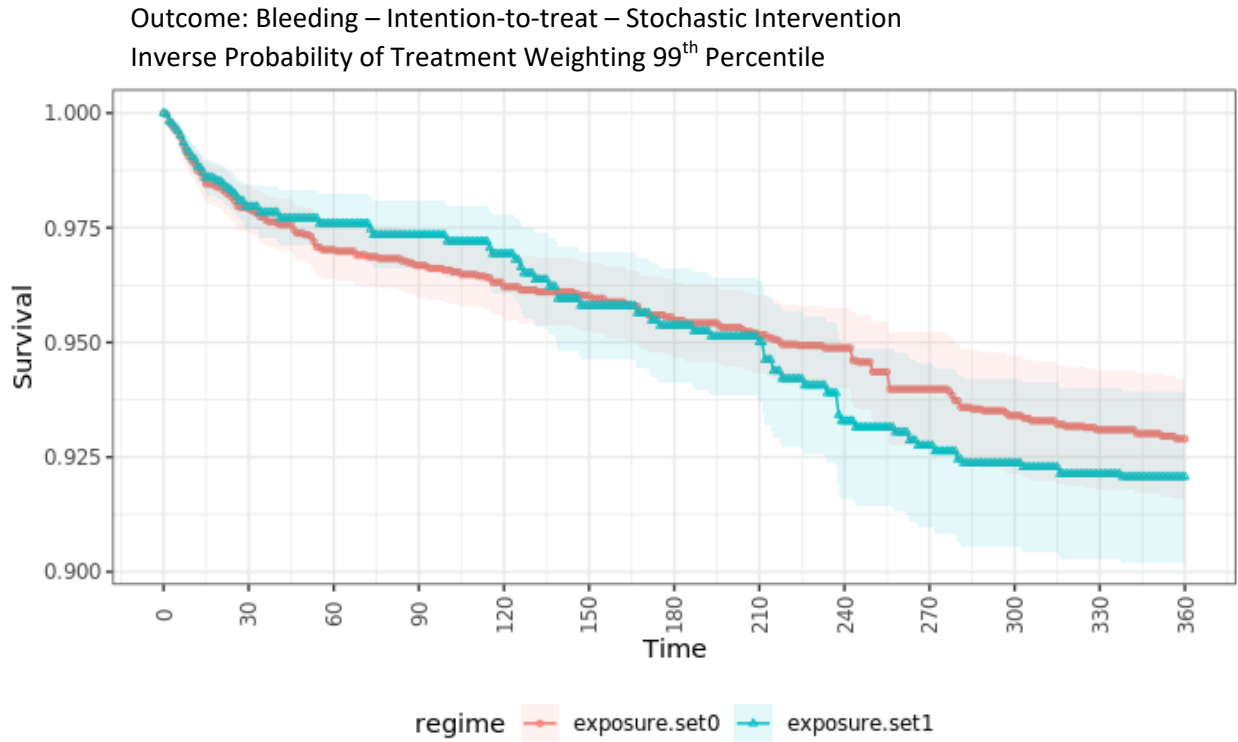



Figure S7C. Sensitivity analysis, major bleeding outcome. Per protocol approach, exposure arm defined by anticoagulant therapy dispensed at hospital discharge, control arm defined by a static treatment regimen, inverse probability of treatment weights calculated from Super Learner suite.

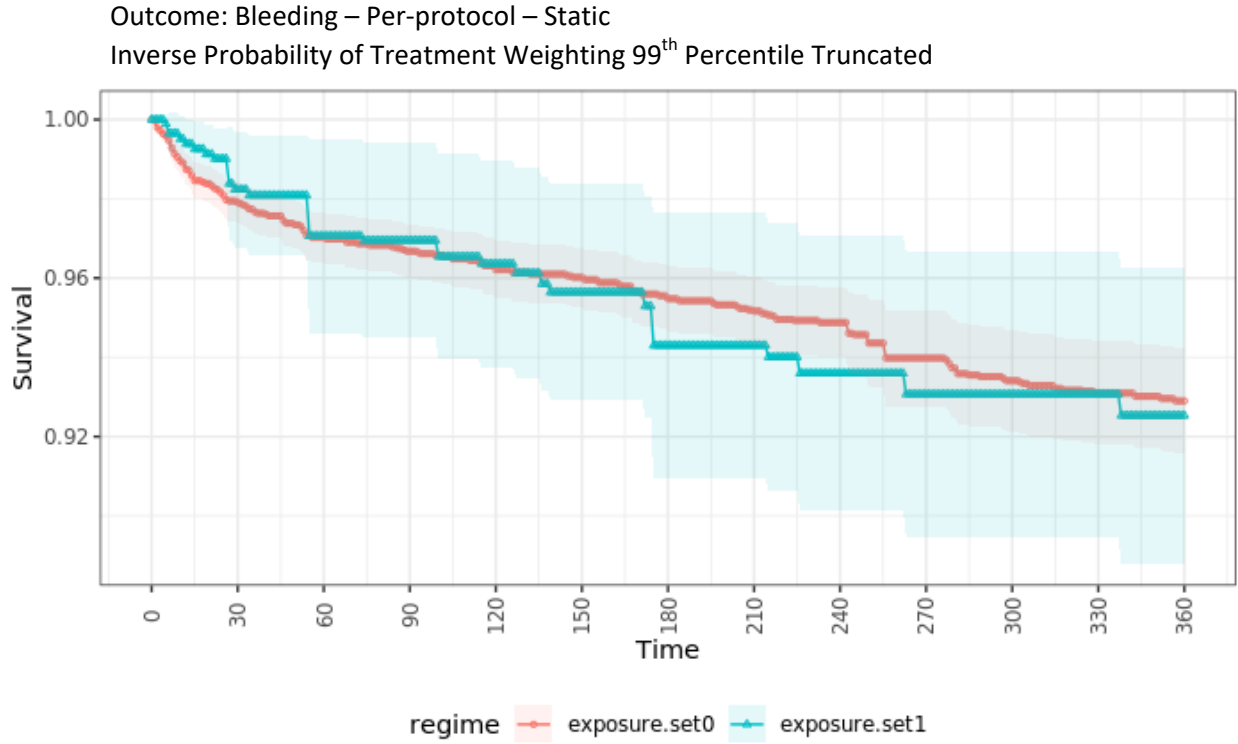

Figure S7D. Sensitivity analysis, major bleeding outcome. Intention-to-treat approach, exposure arm defined by anticoagulant therapy dispensed at hospital discharge, control arm defined by a static treatment regimen, inverse probability of treatment weights calculated from Super Learner suite.

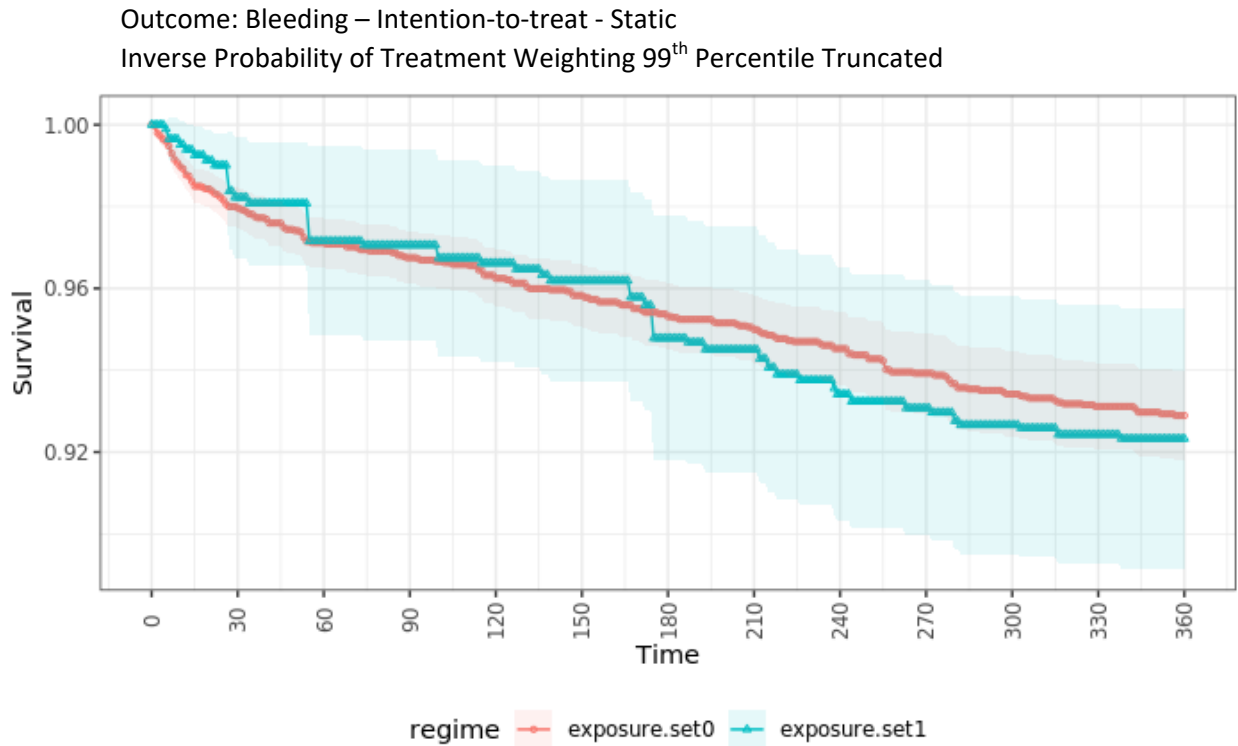

Supplement: NIHMS1870640-supplement-Final_supplement.pdf [file NIHMS1870640-supplement-Final_supplement.pdf]
